# Supplementary material
Source: Springer Nature journal article supplement (https://www.springermedizin.de/resource/supplementary/12885_2012_3820_MOESM4_ESM.pdf/9464322)

0.0 5.26064 7.825618

6.CON 6.D100nM 13.CON 15.CON 13.D100nM 15.D100nM 11.CON 11.D100nM 12.D100nM 12.CON

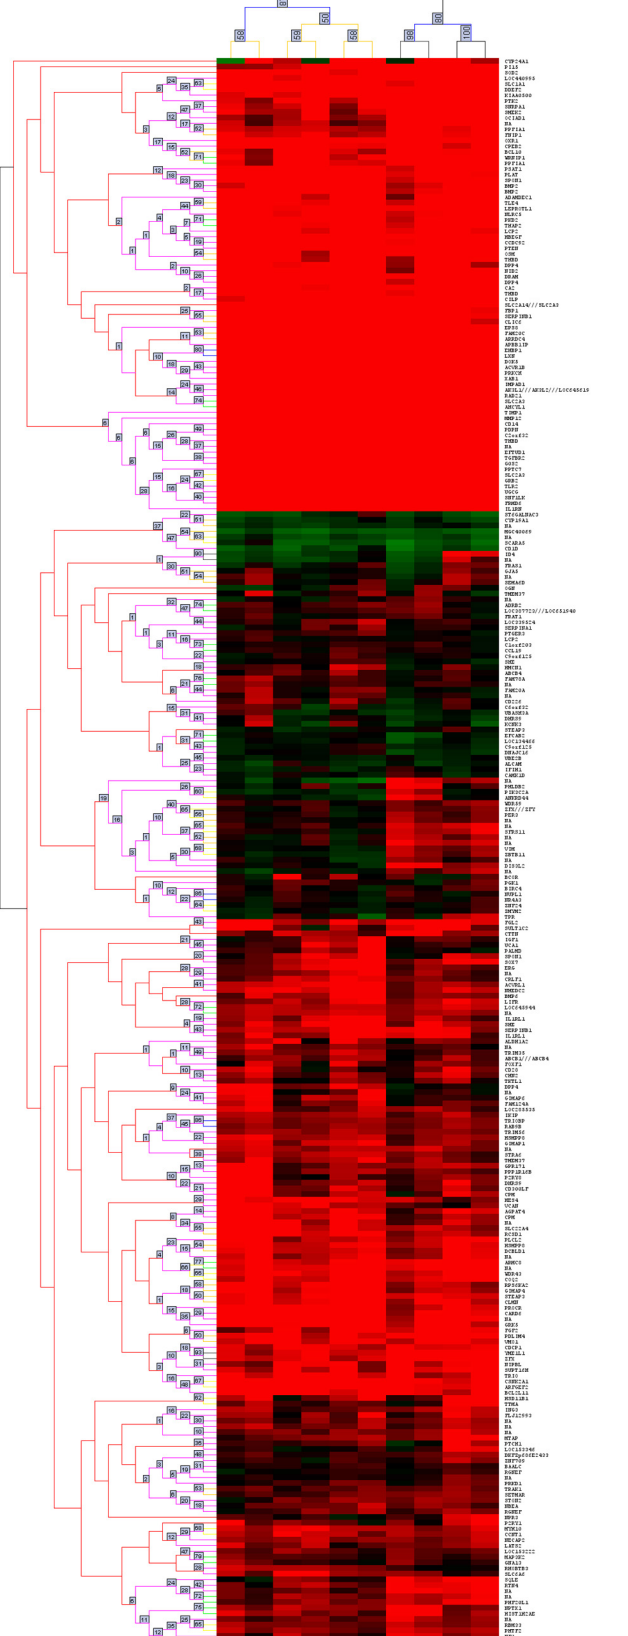

Supplement: MOESM4 [file 9464322]
